# Supplementary material for: A Plasmodium Phospholipase Is Involved in Disruption of the Liver Stage Parasitophorous Vacuole Membrane
Source: PubMed Central journal article supplement (PMC4364735; doi:10.1371/journal.ppat.1004760), 2015-03-18
Supplement: ppat.1004760.s008.pdf [file ppat.1004760.s008.pdf]

| Name                 | Lab-No. | Sequence (5'-3')                           | Purpose                                                                                   |
|----------------------|---------|--------------------------------------------|-------------------------------------------------------------------------------------------|
| PbPL-expression-fw   | 166     | GAATTAAGAAGTCACAGCCGA                      | PbPL gene expression analysis (Figure 1)                                                  |
| PbPL-expression-rev  | 167     | CTTTCTCCGTTTCACTAAGCA                      | PbPL gene expression analysis (Figure 1)                                                  |
| GAPDH-expression-fw  | 180     | GAAGTGACATTGAAGTAGTTGC                     | GAPDH gene expression analysis (Figure 1)                                                 |
| GAPDH-expression-rev | 181     | TAATTGGTTGGCTGTTGAGG                       | GAPDH gene expression analysis (Figure 1)                                                 |
| PbPL-antiserum-fw    | 361     | GCGGATCCTAAGGAAAAAGAATAC<br>GTATCAGAGCATAC | His-PbPL <sub>195-312</sub> expression in bacteria for generation of antiserum (Figure 1) |
| PbPL-antiserum-rev   | 362     | GCCTCGAGCTAAATTTCCATACCAT<br>CGTCAACAGTACC | His-PbPL <sub>195-312</sub> expression in bacteria for generation of antiserum (Figure 1) |
| PbPL-GFP-fw          | 286     | GCAGATCTATGCAAGCATTCTCTT<br>TATAATC        | PbPL-GFP expression in liver stage parasites (Figure 1)                                   |
| PbPL-GFP-rev         | 287     | GCAGATCTATTAGTTGTATTTTATC<br>TATGATATTG    | PbPL-GFP expression in liver stage parasites (Figure 1)                                   |
| mCherry-fw           | 41      | CGTAGGTACCAGCTTAATCTTTTC<br>GAGCTCTTT      | PbPL-GFP expression in liver stage parasites (Figure 1)                                   |
| mCherry-rev          | 42      | ACTGGGTACCCGAAATTGAAGGAA<br>AAAACATCATTTG  | PbPL-GFP expression in liver stage parasites (Figure 1)                                   |
| Hsp70-Promoter-fw    | 6254    | CCGGGTACCGTAATATTTTGTG<br>GTGAGC           | Generation of mCherry <sub>hsp70</sub> parasites (Figure S1)                              |
| Hsp70-Promoter-rev   | 4213    | GGGGATCCCTTTTTTAATTGTAA<br>TTGTAATTTATTGG  | Generation of mCherry <sub>hsp70</sub> parasites (Figure S1)                              |
| Hsp70-3'UTR-fw       | 4214    | GGGACTAGTTATTATTGTTCTGTAC<br>TTCTTTTGTG    | Generation of mCherry <sub>hsp70</sub> parasites (Figure S1)                              |
| Hsp70-3'UTR-rev      | 4215    | GGGGGTACCGAAAATACCAATAA<br>TACCG           | Generation of mCherry <sub>hsp70</sub> parasites (Figure S1)                              |
| Primer-1             | 5510    | GCAAAGTGAAGTTCAAATATGTG                    | Diagnostic PCR of GIMO <sub>ANKA</sub> and mCherry <sub>hsp70</sub> parasites (Figure S1) |
| Primer-2             | 6836    | CGCAATTTGTTGTACATAAAATAG                   | Diagnostic PCR of GIMO <sub>ANKA</sub> and mCherry <sub>hsp70</sub> parasites (Figure S1) |
| Primer-3             | 6841    | AAAATAAAAGGAGGGATCTAGAG                    | Diagnostic PCR of GIMO <sub>ANKA</sub> and mCherry <sub>hsp70</sub> parasites (Figure S1) |
| Primer-4             | 5511    | AGTGACTTTCAGTGAAATCGC                      | Diagnostic PCR of GIMO <sub>ANKA</sub> and mCherry <sub>hsp70</sub> parasites (Figure S1) |
| Primer-5             | 6663    | GTGAGCAAGGGCGAGGAG                         | Diagnostic PCR of GIMO <sub>ANKA</sub> and mCherry <sub>hsp70</sub> parasites (Figure S1) |
| Primer-6             | 5514    | CTTGACAGCTCGTCCATGC                        | Diagnostic PCR of GIMO <sub>ANKA</sub> and mCherry <sub>hsp70</sub> parasites (Figure S1) |
| Primer-7             | 4698    | GTTGCTAAACTGCATCGTC                        | Diagnostic PCR of GIMO <sub>ANKA</sub> and mCherry <sub>hsp70</sub> parasites (Figure S1) |
| Primer-8             | 4699    | GTTTGAGGTAGCAAGTAGACG                      | Diagnostic PCR of GIMO <sub>ANKA</sub> and mCherry <sub>hsp70</sub> parasites (Figure S1) |
| Primer-1             | 424     | TGCTCTTCTACCAAGATACGCACT                   | Diagnostic PCR of WT, KO and KO-MF parasites (Figure 2)                                   |

|                |     |                                           |                                                           |
|----------------|-----|-------------------------------------------|-----------------------------------------------------------|
| Primer-2       | 425 | TGCATACCCAAATGGCGAAT                      | Diagnostic PCR of WT, KO and KO-MF parasites (Figure 2)   |
| Primer-3       | 420 | CTTTGGTGACAGATACTAC                       | Diagnostic PCR of WT, KO and KO-MF parasites (Figure 2)   |
| Primer-4       | 426 | CCCAAAGGTGCTGAATATGCATTC<br>CGT           | Diagnostic PCR of WT, KO and KO-MF parasites (Figure 2)   |
| Primer-5       | 577 | GTGACAGGGGGAATG                           | Diagnostic PCR of WT, KO and KO-MF parasites (Figure 2)   |
| Primer-6       | 578 | GATAGCACTACCACCGG                         | Diagnostic PCR of WT, KO and KO-MF parasites (Figure 2)   |
| Primer-7       | 579 | CCACCAATTTAAAGATAGTGTG                    | Diagnostic PCR of WT, KO and KO-MF parasites (Figure 2)   |
| PbPL-5FR-fw    | 646 | AACCGCGCGGAAAATTTTCATTGT<br>ATTACATCAAT   | Generation of complemented KO parasites (Figure 3)        |
| PbPL-nterm-rev | 637 | TCTTCTGTATGTTCTGATATGG                    | Generation of complemented KO parasites (Figure 3)        |
| PbPL-cterm-fw  | 579 | CCACCAATTTAAAGATAGTGTG                    | Generation of complemented KO parasites (Figure 3)        |
| PbPL-cterm-rev | 632 | AAGCGGCCGCATTAGTTGATTTTT<br>ATCTATGATATTG | Generation of complemented KO parasites (Figure 3)        |
| Primer-1       | 728 | GTGTAGTAACATCAGTTATTGTGTG                 | Diagnostic PCR of complemented KO parasites (Figure 3)    |
| Primer-2       | 729 | ATACTGTATAACAGGTAAGCTGTTA<br>TTGTG        | Diagnostic PCR of complemented KO parasites (Figure 3)    |
| Primer-3       | 730 | TTTCCCAGTCACGACGTTG                       | Diagnostic PCR of complemented KO parasites (Figure 3)    |
| Primer-4       | 731 | CTTAGTGTTTTGTATTAATGTCGATT<br>TG          | Diagnostic PCR of complemented KO parasites (Figure 3)    |
| Pb18S-fw       | 793 | AAGCATTAATAAAGCGAATACATC<br>CTTAC         | Real-time PCR for determination of liver load (Figure S3) |
| Pb18S-rev      | 794 | GGAGATTGGTTTTGACGTTTATGTG                 | Real-time PCR for determination of liver load (Figure S3) |
| MmHPRT-fw      | 795 | GTAATGATCAGTCAACGGGGGAC                   | Real-time PCR for determination of liver load (Figure S3) |
| MmHPRT-rev     | 796 | CCAGCAAGCTTGCAACCTTAACCA                  | Real-time PCR for determination of liver load (Figure S3) |
